# Supplementary material for: Molecular Typing of Leishmania spp. Causing Tegumentary Leishmaniasis in Northeastern Italy, 2014–2020
Source: MDPI journal article supplement (doi:10.3390/pathogens13010019), 2023-12-24
Supplement: s1 [file s1]

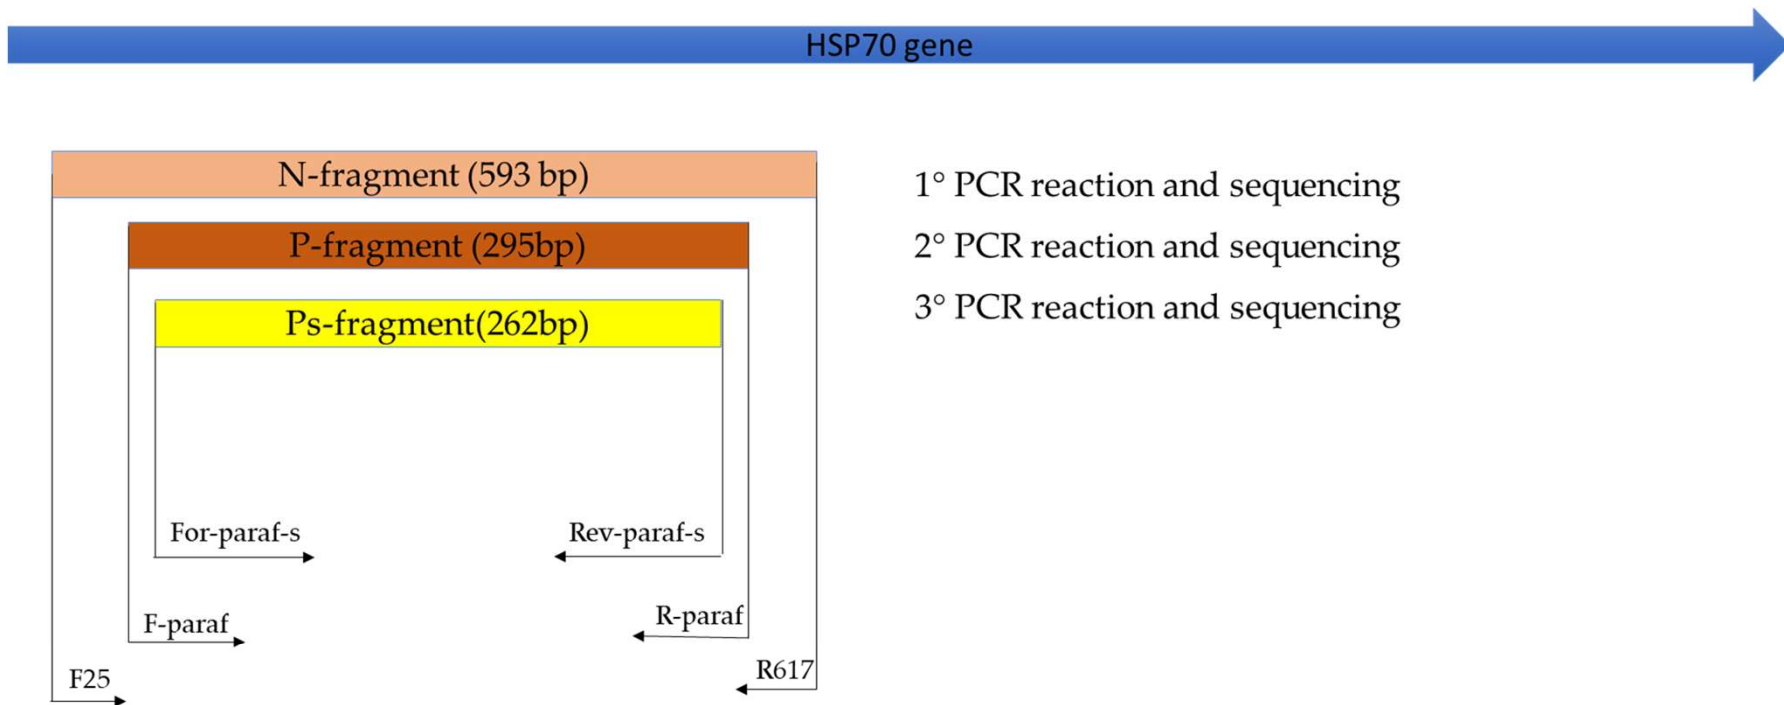

Figure S1. Primers used and amplification products obtained and sequenced within the hsp70 coding region.
